# 1 **Predictors of abnormal Thompson score in term neonates in a tertiary** 2 **hospital in Zimbabwe**

3 \*Khan, N.<sup>1</sup>, \*Mugwagwa, E.<sup>2</sup>, Cortina-Borja<sup>1</sup>, M., Catherall, E.<sup>3</sup>, Fitzgerald, F.<sup>4</sup>, Chimhuya,  
4 S.<sup>5</sup>, Chimhini, G.<sup>5</sup>, Gannon, H.<sup>1</sup>, Crehan, C.<sup>1</sup>, Mangiza, M.<sup>6</sup>, Heys, M.<sup>1</sup>

5  
6 \*joint first author

7 on behalf of the Neotree team

8  
9 <sup>1</sup> Population, Policy and Practice Research and Teaching Department, Great Ormond Street  
10 Institute of Child Health, University College London, London, UK.

11 <sup>2</sup> London School of Hygiene and Tropical Medicine

12 <sup>3</sup> Department of International Development, London School of Economics and Political  
13 Science

14 <sup>4</sup> Department of Infectious Disease, Imperial College London

15 <sup>5</sup> Department of Paediatrics and Child Health, University of Zimbabwe

16 <sup>6</sup> Sally Mugabe Central Hospital, Harare, Zimbabwe

## 17 18 **Abstract**

### 19 20 **Background**

21 Neonatal encephalopathy, abnormal neurological function in a baby born at term is a key cause of  
22 neonatal death. In the absence of adequate training and brain imaging or monitoring in low-resource  
23 settings, clinical risk scores, such as Thompson score, have been useful to predict risk of neonatal  
24 encephalopathy. A clearer understanding of the clinical and maternal predictors of abnormal values of  
25 Thompson score would be beneficial to identify term neonates with suspected neonatal encephalopathy.

**NOTE: This preprint reports new research that has not been certified by peer review and should not be used to guide clinical practice.**

## 26 **Methods**

27 A scoping review of the literature identified a set of *a priori* neonatal and maternal variables associated  
28 with neonatal encephalopathy in low-resource settings. Next, a prospective study of all neonates born  
29 at term admitted to Sally Mugabe Central Hospital in Zimbabwe between October 2020 and December  
30 2022 ( $n=6,054$ ) was conducted. A predictive statistical model for abnormal ( $>10$ ) Thompson score  
31 (range 0-22) was developed.

## 32 **Results**

33 In total 45 articles were identified from three databases and 10 articles were selected. 45 candidate  
34 predictors were identified - 36 from the available literature and 9 from clinical data and experience.  
35 4.06% ( $n=246$ ) of neonates had an abnormal Thompson score of 10 or more on admission and 90.65%  
36 ( $n=223$ ) of these neonates had an Apgar score less than 7 at 5 mins ( $p<0.001$ ). 24 possible predictors  
37 were selected as the most important of which nine factors were identified as the most useful in  
38 predicting which neonates are at risk of abnormal Thompson score. These predictors and their adjusted  
39 odds ratios are: low Apgar score at 5min (OR= 0.46, 95%CI=(0.42, 0.51)), low neonatal heart rate at  
40 admission (OR=0.977, 95%CI=(0.97, 0.985)), temperature lower than 36.5°C (OR=1.64,  
41 95%CI=(1.18, 2.28)), abnormal head shape (OR=2.12, 95%CI=(1.51, 2.97)), resuscitation received  
42 (OR=3.95, 95%CI=(1.69, 11.01)), neonatal encephalopathy as an admission reason (OR= 2.47,  
43 95%CI=(1.37, 4.32)), risk factors of sepsis other than premature rupture of membrane and offensive  
44 liquor (OR=2.04, 95%CI=(1.1, 3.67)), respiratory distress as an admission reason (OR=2.48,  
45 95%CI=(1.59, 3.96)), and other admission reasons (OR=1.81, 95% CI=(1.12, 2.97)). The main  
46 admission reasons in 'Other' category include low birthweight, meconium aspiration and hypoxic  
47 ischaemic encephalopathy and congenital abnormality.

## 48 **Conclusion**

49 In resource-poor settings where it may be not possible to clinically assess all admitted neonates, those  
50 with the identified risk factors should be prioritised for a Thompson score assessment. Local clinical

51 guidelines should incorporate these factors into the clinical management of at-risk neonates and assess  
52 their impact on clinical care and neonatal outcomes.

53

## 54 **Introduction**

55 Progress has been made globally in reducing under-5 mortality; however, mortality in newborns (below  
56 28 days of age) remains disproportionately high, accounting for nearly half of under-5 deaths (World  
57 Health Organization, 2020). Globally 2.4 million neonates die within the first 28 days of life. Of these  
58 deaths, 90% occur in low-to-middle income countries, with the highest neonatal mortality rates  
59 occurring in sub-Saharan Africa (Liang et al., 2018). The three commonest causes of mortality are  
60 infection, prematurity and neonatal encephalopathy (NE) (Ou et al., 2022).

61 NE is typified by abnormal neurological function in the first few days of life in a baby born at term  
62 (gestational age of 37 weeks or more). It can be defined as a neonatal neurological syndrome  
63 characterised by depressed levels of consciousness, seizures, abnormal tone, respiratory depression and  
64 impaired feeding (Volpe, 2012). Among others, NE can be caused by perinatal asphyxia, metabolic  
65 disorders, perinatal infections and placenta abnormalities (Aslam et al., 2019). Hypoxic Ischaemic  
66 Encephalopathy (HIE) is a condition characterised by the presence of NE with evidence of hypoxic-  
67 ischaemia as the cause (Kurinczuk et al., 2010). In addition to causing an estimated one million deaths  
68 worldwide every year, NE is a cause of significant life-long disability (Tann et al., 2018). However,  
69 clinical diagnosis and management is difficult in most low-resource settings where the majority of these  
70 neonates are born.

71 In high-resource settings, the diagnosis of NE and identification of its underlying risk factors are  
72 determined by clinical assessment and investigation of the mother and baby including cord blood  
73 arterial blood gases, neuroimaging procedures such as continuous amplified electroencephalogram  
74 (EEG) and magnetic resonance imaging (MRI) (Vannucci, 2000). Continuous amplified EEG and MRI  
75 are rarely available in low-resource settings where diagnosis is made on clinical features alone. Hence

76 it is often challenging to diagnose NE with certainty in such settings, or differentiate between NE caused  
77 by perinatal asphyxia or other causes.

78 Clinical prediction scores combining clinical features with EEG result have been developed to  
79 categorise severity of NE and predict neurodevelopmental sequelae in neonates with a well-defined  
80 episode of foetal distress, such as the Sarnat and Sarnat score (Sarnat & Sarnat, 1976). The Sarnat and  
81 Sarnat score has two key limitations, namely the reliance on EEG and a need to incorporate a well-  
82 defined episode of foetal distress - neither of which are routinely available in low-resource settings due  
83 to lack of monitoring during labour. To address these gaps, Thompson et al. (1997) developed a  
84 simplified score incorporating findings on clinical examination alone. The Thompson score relies on  
85 nine clinical features and assigns a score of 0 to 2 or 3 per feature to characterise peak severity of  
86 encephalopathy in term neonates (range 0-22). Infants with a score of 0 are considered normal, those  
87 with a score between 1 and 10 are considered to have a diagnosis of mild NE; a score 11-14 is considered  
88 indicative of moderate NE and a score of 15-22 as severe NE. The Thompson score is mainly reported  
89 in the literature to examine and characterise NE in cohorts that are already suspected of perinatal  
90 asphyxia and NE.

91 A high value of Thompson score within the first seven days of life is a sensitive predictor of abnormal  
92 neurodevelopmental outcome (Thorson et al., 2016; Weeke et al., 2017; Mendler et al., 2018). However,  
93 criteria for measuring an infant's Thompson score, namely: "*if clinical signs of hypoxic-ischemic*  
94 *encephalopathy developed after birth*" are unclear and difficult to operationalise in neonatal units where  
95 clinical staff may not be sufficiently skilled in identifying clinical signs of NE (Thompson et al., 1997).  
96 Therefore, the underlying reasons for suspecting NE and subsequently wanting to measure the  
97 Thompson score are neither clearly stated nor uniform across different studies (Badawi et al., 1998;  
98 Biselele et al., 2014). Nevertheless, these studies provide valuable evidence for the various maternal  
99 and neonatal factors that may trigger clinicians to use the Thompson score. For example, Badawi et al.  
100 (1998), included maternal criteria such as severe pre-eclampsia and moderate-severe vaginal bleeding  
101 during pregnancy in increasing risk of NE and thus a reason to calculate a Thompson score. Further  
102 work is needed to clarify the prognostic value of the Thompson score in the first few hours of life or at

103 admission to a neonatal unit. This will help the healthcare providers identify the neonates at risk of NE  
104 on admission and therefore should be prioritised for examination and assessment.

105 As part of a wider programme of work in Malawi and Zimbabwe a digital health intervention called  
106 Neotree has been developed to improve neonatal care and outcomes (Heys et al., 2022, Khan et al 2022,  
107 Crehan et al., 2019, Gannon et al., 2021). Neotree provides data capture, clinical decision support and  
108 education in newborn care, with accompanying process for data collection, curation, visualisation, and  
109 export (Khan et al., 2022). It has been embedded as part of daily care at two sites in Zimbabwe (Sally  
110 Mugabe Central Hospital and Chinhoyi Provincial hospital) and one site in Malawi (Kamuzu Central  
111 Hospital). A clinical diagnostic algorithm for NE is being developed within this wider programme of  
112 work. At first, international and national evidence-based guidelines describing risk factors for NE were  
113 digitalised. Next, a Delphi review was conducted by a panel of international experts in newborn care,  
114 who reviewed the NE algorithm proposed by the Neotree team and concluded that there was a lack of  
115 evidence for these risk factors to be used for NE diagnosis (Evans et al., 2021). The use of validated  
116 encephalopathy scores such as the Thompson score was recommended instead (Biselele et al., 2014) to  
117 guide the diagnosis and clinical management of NE. However, due to a shortage of skilled healthcare  
118 professionals in low-resource settings, it is not always feasible to conduct a Thompson score assessment  
119 on all term neonates admitted to newborn care units (Crehan et al. 2019). Furthermore, it remains  
120 unclear which neonates should be prioritised for a detailed neurological and Thompson score  
121 assessment (Mrelashvili et al., 2020).

122 The goal of this study is to characterise neonates at risk of NE born in low-resource settings where  
123 routine access to blood tests or neurological investigations can be scarce. Our aim is to develop a  
124 statistical predictive model for an abnormal Thompson score values that can be incorporated into  
125 clinical pathways for newborn care to enable healthcare providers to consistently and explicitly decide  
126 which infants to screen for NE using the Thompson Score. *A priori* variables were identified to develop  
127 a predictive model for abnormal Thompson score values. This helps us to understand the role of  
128 neonatal and maternal predictors which identify neonates in need of measuring their Thompson score.

129 A scoping review to determine a priori predictors of abnormal Thompson score was conducted, and.  
130 routine data collected from a neonatal intensive care unit of a tertiary hospital in Zimbabwe were  
131 analysed.

## 132 **Methods**

### 133 Step 1: Scoping review

134 To identify maternal and neonatal clinical and demographic factors that might be associated with  
135 abnormal Thompson score and thus a high likelihood of diagnosis of NE, three search engines were  
136 used to find articles published up to 31 July 2022: Medline (PubMed), Scopus and Web of Science.  
137 The following PICO (Population, Intervention, Comparison, Outcome) terms were used for the  
138 literature search and the exact search strings are included in the supplementary material:

- 139 - Population: Neonates born in low resource settings
- 140 - Intervention/exposure: Any maternal, perinatal and neonatal factors predictive of NE
- 141 - Comparison: None
- 142 - Outcome: NE cases with abnormal Thompson score, Sarnat score or Hypoxic ischaemic  
143 encephalopathy score.

144 Titles and abstracts were evaluated for eligibility. Inclusion criteria for full-texts included: a) neonates;  
145 b) with a diagnosis of (i) hypoxic ischaemic encephalopathy or NE or (ii) birth asphyxia or (iii) perinatal  
146 asphyxia; c) assessed using Thompson score, Sarnat score or Hypoxic ischaemic encephalopathy score;  
147 d) studies that also included maternal factors; and e) studies in low-income, low- and middle-income  
148 countries or low-resourced settings. Exclusion criteria included: a) animal studies; b) studies not  
149 published in English; c) use of scoring systems other than Thompson score, Sarnat score or Hypoxic  
150 ischaemic encephalopathy score; d) clinical trials; e) not including risk factors or predictors of NE.

151

### 152 Step 2: Modelling of risk factors associated with abnormal Thompson score

#### 153 **Study setting and population**

154 All neonates born at term (gestation age  $\geq 37$  weeks) who were admitted in the neonatal unit of Sally  
155 Mugabe Central Hospital in Zimbabwe and were assessed for Thompson score were included in the  
156 study. Data were collected as per usual clinical care at the bedside using Neotree and pseudonymised  
157 prior to analysis (Heys et al., 2022). 1<sup>st</sup> October 2020 to 31<sup>st</sup> December 2022 was selected as the study  
158 period as Thompson scores were regularly taken for all term neonates during this time. The hospital  
159 has a 100-bed neonatal unit and on average 225 monthly admissions. Available equipment include  
160 oxygen and non-invasive ventilation but there is no access to brain imaging, electroencephalogram, or  
161 cord blood samples to clinically assess NE in neonates (Gannon et al., 2022). Neonatal mortality rate  
162 for the study period was 112 per 1000 admissions (95%CI = (103, 121)).

### 163 **Main outcome measure**

164 Thompson et al. (1997) showed that in normothermic infants, a score  $>10$  in the first 7 days of life can  
165 predict abnormal neurodevelopmental outcomes with 100% sensitivity and 61% specificity.  
166 Therefore, the main outcome is Thompson score  $>10$  at admission.

### 167 **Predictive variables**

168 The predictive variables were derived from the scoping review in step 1 and from existing national and  
169 international guidelines that were explored in a previous Delphi study (Evans et al., 2021). This mapped  
170 list of candidate predictors was reviewed by a group of six neonatal experts working in Zimbabwe and  
171 Malawi. The experts were asked to evaluate the initial list of predictors and add any other predictors  
172 they thought were missing, based on their clinical experience. 6 potential predictors were identified  
173 from this process. Neotree data dictionary was reviewed to identify which predictors are included in the  
174 data collected through Neotree and the final set of predictive variables was created.

### 175 **Data Analysis**

176 Missing data in categorical variables were coded as a 'missing' category. Numeric predictive variables  
177 were assessed to ascertain whether data were missing at random or not at random and imputed using  
178 conditional medians. Generalised linear modelling was used to determine the effect that the selected *a priori*  
179 variables had on the probability that a neonate had a Thompson score  $>10$ . Association between

180 categorical variables was analysed using  $\chi^2$  test. To prevent overfitting the dataset was limited to only  
181 those input variables that were most predictive for the outcome variable. Logistic regression models  
182 were fitted for the final set of variables and Akaike's Information Criterion (AIC) was used as a criterion  
183 of goodness-of-fit.

184 All analyses were performed in the R statistical language (version 4.1.2) on R Studio (R Core Team,  
185 2021).

186

## 187 **Results**

### 188 Scoping review

189 In total 45 papers were identified from three databases and three were excluded for not meeting the  
190 language criteria. 42 articles were assessed for eligibility and 32 were excluded for reasons included in  
191 Figure 1. This resulted in 10 papers that described Thompson score or Sarnat grading or HIE score in  
192 neonates in low-and-middle income countries with known or suspected diagnosis of NE (or HIE/BA/PA  
193 etc). These papers included description of maternal, perinatal or neonatal factors that might be  
194 associated with a diagnosis of NE/HIE/BA/PA.

195

196 Figure 1: PRISMA flow diagram

197 Table 1 includes the details of the studies selected, including study type, sample size, study setting,  
198 inclusion criteria, and the scoring system used. Out of 10 identified studies, three studies were  
199 prospective cross-sectional (Bhagwani et al., 2016; Biselele et al., 2013; Sadhanidar et al., 2022), two  
200 were prospective observational (Biselele et al., 2014; Doreswamy & Ramakrishnegowda, 2021), two  
201 were prospective cohort studies (Horn et al., 2013; Mwakyusa et al., 2009) and three were retrospective  
202 (Eutrakul et al., 2006; Shah et al., 2005; Stofberg et al., 2020). These studies were conducted in India  
203 ( $n=3$ ), Nepal ( $n=1$ ), Thailand ( $n=1$ ), Democratic Republic of Congo ( $n=2$ ), South Africa ( $n=2$ ), and  
204 Tanzania ( $n=1$ ). Sample sizes ranged from 20 to 145 and all described term neonates admitted with a  
205 diagnosis of perinatal asphyxia. Low Apgar score ( $<6$  or  $\leq 7$ ) was included as an inclusion criterion to



206 determine perinatal asphyxia in seven out of 10 of the studies and six studies described the use of  
207 Thompson score to determine NE.

208 Biselele et al. (2014) studied the evolution of Thompson score over the first 6 hours of life and found  
209 that the scores change over this time. In a study to understand the clinical profile of asphyxiated  
210 newborns, Shah et al. (2005) found that common presentations of HIE had reflexes, seizures, lethargy,  
211 and pupillary abnormalities. Subtle seizure, meconium-stained liquor, post-term, and lack of antenatal  
212 check-up were reported as key risk factors by Bhagwani et al. (2016). Similar findings were also  
213 reported by Futrakul et al. (2006). The authors retrospectively modelled the risk factors of HIE and  
214 found inappropriate antenatal care, post-term gestation, vacuum extraction, male gender, prolapsed  
215 cord, and Apgar scores at 1 and 5-minute to be significant risk factors of HIE. High maternal age  
216 (median 31 years) and a high incidence of pre-eclampsia were found in the study sample of Biselele et  
217 al. (2013). The authors compared Thompson score and Sarnat score and found correlation between the  
218 two scores, as well as with mortality and individual scoring system. In contrast, Mwakuyasa et al. (2008)  
219 reported developmental outcome at 6 months of age of 140 neonates diagnosed with birth asphyxia and  
220 found that higher Thompson scores were associated with increased risk of death, seizures and poor  
221 neurological outcome. Horn et al. (2013) found that Thompson score could be used to predict death or  
222 a persistently severely abnormal amplitude-integrated electroencephalogram (aEEG) at 48-hour. The  
223 authors suggested that a score  $\geq 16$  could be used to identify neonates who will have a poor outcome  
224 despite cooling. Stofberg et al. (2020) reported similar findings where neonates with Thompson score  
225  $\geq 12$  were associated with abnormal aEEGs, indicative of HIE. Non-operative deliveries, lack of a doctor  
226 at the time of delivery and neonatal chest compressions were also associated with abnormal aEEGs.

227 Doreswamy and Ramakrishnegowda (2021) conducted a study to validate Prediction of Encephalopathy  
228 in Perinatal Asphyxia (PEPA) score by Holdout method where Thompson score between 3 and 5-hour  
229 of life was used to determine post-test probability of developing encephalopathy. The authors found  
230 that PEPA score had a higher sensitivity than National Institute of Child Health and Human  
231 Development (NICHD) criteria for prediction of HIE in asphyxiated neonates.

232 From these studies a list of 36 factors that might be associated with an abnormal Thompson score was  
 233 compiled (Appendix A). Combining these with the nine predictors identified from clinician consultation  
 234 and Neotree data, in total 45 potential predictors were identified. 15 of these predictors were either  
 235 already included as part of the Thompson score or were not currently collected as part of routine data  
 236 capture via Neotree, leaving 29 potential factors to consider. 11 predictive variables were collapsed into  
 237 five variables (A and B), leaving 24 candidate measures (Appendix A).

238 **Table 1: Studies selected from the scoping review**

| Study                  | Sample | Study design                 | Setting                                | Inclusion criteria                                                                                                   | Scoring system used               |
|------------------------|--------|------------------------------|----------------------------------------|----------------------------------------------------------------------------------------------------------------------|-----------------------------------|
| Bhagwani et al. (2016) | 145    | Prospective, cross-sectional | Hindu Rao Hospital, New Delhi, India   | Full-term neonates with low-Apgar score, i.e., 1 min score of $\leq 7$                                               | Thompson score                    |
| Biselele et al. (2013) | 50     | Prospective, cross-sectional | University Hospital of Kinshasa, Congo | Term and near-term newborn                                                                                           | Sarnat grading and Thompson score |
| Biselele et al. (2014) | 20     | Prospective, observational   | University Hospital of Kinshasa, Congo | Term and near-term newborn, Apgar <6 after 5 min, Resuscitation until 10 min after birth, pH <7 and base excess more | Thompson score                    |

|                                       |                                     |                           |                                                |                                                                                                                                                      |                              |
|---------------------------------------|-------------------------------------|---------------------------|------------------------------------------------|------------------------------------------------------------------------------------------------------------------------------------------------------|------------------------------|
|                                       |                                     |                           |                                                | than 16 on umbilical cord blood or any blood sample (arterial, venous or capillary) within 60 min of birth, Thompson score > 5 one hour after birth. |                              |
| Doreswamy and Ramakrishnegowda (2021) | 55                                  | Prospective observational | India                                          | Neonates > 35 weeks of gestation with birth weight $\geq 1800$ g and requiring resuscitation at birth                                                | Thompson score               |
| Futrakul et al. (2006)                | 84 newborns with perinatal asphyxia | Retrospective             | King Chulalongkorn Memorial Hospital, Thailand | Term neonates ( $\geq 36$ ) weeks of gestation with Apgar score < 6 at 1 minute                                                                      | Modified Sarnat-Sarnat Score |
| Horn et al. (2013)                    | 41                                  | Prospective cohort study  | Three hospitals in Cape Town, South Africa     | Gestation week $\geq 36$ and birth weight $\geq 2000$ g, with signs of                                                                               | Thompson score               |

|                          |     |                             |                                                               |                                                                                                                                                                       |                                            |
|--------------------------|-----|-----------------------------|---------------------------------------------------------------|-----------------------------------------------------------------------------------------------------------------------------------------------------------------------|--------------------------------------------|
|                          |     |                             |                                                               | encephalopathy after age 10 minutes but before age 5 hours. 10-min Apgar score <7 or continued respiratory support at age 10 min.                                     |                                            |
| Mwakyusa et al. (2009)   | 140 | Prospective cohort study    | Muhimbili National Hospital, Dar-es-Salaam, Tanzania          | Full-term neonates with low-Apgar score (i.e. a 5 min score $\leq 7$ ) or post-asphyxial symptoms admitted within 24 h of delivery or with symptoms and signs of HIE. | HIE score (modified Sarnat scoring system) |
| Sadhanidar et al. (2022) | 50  | Prospective cross-sectional | A tertiary care government hospital in Guwahati, Assam, India | All haemodynamically stable newborns irrespective of the gestational age sustaining perinatal asphyxia with clinical                                                  | Sarnat and Sarnat Staging system           |

|                        |    |               |                                                          |                                                                                                                                                                                                                                                                             |                                  |
|------------------------|----|---------------|----------------------------------------------------------|-----------------------------------------------------------------------------------------------------------------------------------------------------------------------------------------------------------------------------------------------------------------------------|----------------------------------|
|                        |    |               |                                                          | diagnosis of HII were included.                                                                                                                                                                                                                                             |                                  |
| Shah et al. (2005)     | 50 | Retrospective | B.P. Koirala Institute of Health Sciences, Dharan, Nepal | Gestational age $\geq 37$ weeks with Apgar score $\leq 6$ at 5 minutes                                                                                                                                                                                                      | Sarnat and Sarnat Staging system |
| Stofberg et al. (2020) | 29 | Retrospective | A district hospital in Cape Town, South Africa           | Gestational age $\geq 36$ weeks, birth weight $\geq 1.8$ kg, a sentinel event in the perinatal course, Apgar score $\leq 7$ at 5min, prolonged resuscitation needed at birth (more than 10 min), proven acidosis within the first hour or life, and other clinical features | aEEG and Thompson score          |

239

240 Modelling

241 **Study population**

242 There were 9,445 newborns admitted during the study period of October 2020 to December 2022, and  
243 6,109 term neonates meeting the inclusion criteria. Neonatal mortality rate among term neonates with  
244 a recorded outcome was 112 per 1000 admissions (95%CI = (103, 121)).

245 The Thompson score outcome was missing in 55 (0.9%) and were excluded given the proportion is  
246 very small, resulting in a total sample size of 6,054 neonates. Of the 24 candidate predictors, 11 had  
247 missing values. For foetal heart rate (0.11%), maternal age (0.33%), and temperature at admission  
248 (0.69%) they were imputed using medians. For birthweight (0.26%) and Apgar score (5.2%) they  
249 were imputed as medians conditional on the gestational age and Thompson score values, respectively.  
250 For categorical predictors, namely resuscitation (3.15%), meconium-stained liquor passed (9.78%),  
251 maternal HIV infection (10.3%), meconium-stained umbilicus (11.1%), place of birth (11.7%), and  
252 duration of labour (16.09%) a “missing” category was included (Table 2).

253 Of these 6,054 neonates, 57.6% were male and 70.7% were born via spontaneous vaginal delivery.  
254 558 (9.22%) neonates did not have any outcomes recorded. Among the rest 5,496, 88.8% of newborns  
255 survived to discharge, giving an overall case fatality rate of 112 per 1000 admitted term neonates (CI  
256 103.4-121.3). Mean maternal age was 25 years (SD 7). Mean Thompson score was 1.996, Median  
257 Thompson score was zero (IQR 0-2). 246 (4.06%) of neonates had a Thompson score of greater than  
258 10 equating to a rate of 40 per 1000 admitted neonates. 511 (8.4%) of neonates had a Thompson score  
259 of greater than 7.

260 Table 2: Demographic characteristics of the study sample ( $n=6,054$ )

|                |        | Distribution of variables    |                            |                       | Univariate logistic regression |            |
|----------------|--------|------------------------------|----------------------------|-----------------------|--------------------------------|------------|
| Predictor      | Levels | Total neonates ( $n=6,054$ ) | TS $\leq 10$ ( $n=5,808$ ) | TS $> 10$ ( $n=246$ ) | Unadjusted odds ratio (95% CI) | $p$ -value |
| Gender $n$ (%) | Female | 2557 (42.2)                  | 2463 (96.32)               | 94 (3.68)             | Reference                      | -          |

|                                                   |                      |                               |                               |                               |                            |         |
|---------------------------------------------------|----------------------|-------------------------------|-------------------------------|-------------------------------|----------------------------|---------|
|                                                   | Male                 | 3488<br>(57.6)                | 3336<br>(95.64)               | 152<br>(4.36)                 | 1.19 (0.92-<br>1.557)      | 0.19    |
|                                                   | Unsure               | 9 (0.15)                      | 9                             | -                             | -                          | -       |
| Gestational age<br>(weeks),<br>median [Q1-<br>Q3] | -                    | 39.0 [38.0-<br>40.0]          | 39.0<br>[38.0-<br>40.0]       | 39.0<br>[38.0-<br>40.0]       | 1.0 (0.918-<br>1.088)      | 0.998   |
| Heart rate<br>median [Q1-<br>Q3]                  | -                    | 138.0<br>[127.0-<br>146.0]    | 138.0<br>[128.0-<br>146.0]    | 127.0<br>[112.0-<br>143.0]    | 0.97<br>(0.963-<br>0.975)  | <0.001* |
|                                                   | Missing <i>n</i> (%) | 7 (0.1%)                      | 6 (85.7%)                     | 1<br>(14.3%)                  | -                          | -       |
| Birthweight<br>(grams)<br>median [Q1-<br>Q3]      | -                    | 3000.0<br>[2600.0-<br>3400.0] | 3000.0<br>[2600.0-<br>3400.0] | 3025.0<br>[2750.0-<br>3382.0] | 1.00<br>(0.999-<br>1.0003) | 0.43    |
|                                                   | Missing <i>n</i> (%) | 16 (0.26)                     | 15<br>(93.8%)                 | 1 (6.2)                       | -                          | -       |
| Apgar score at<br>5 mins median<br>[Q1-Q3]        | -                    | 8.0 [6.0-<br>9.0]             | 8.0 [7.0-<br>9.0]             | 4.0 [3.0-<br>5.0]             | 0.36 (0.33-<br>0.39)       | <0.001* |
|                                                   | Missing <i>n</i> (%) | 315 (5.2)                     | 308<br>(97.8)                 | 7 (2.2)                       | -                          | -       |
| Maternal age<br>(years)                           | -                    | 25 [21-31]                    |                               |                               | 0.98<br>(0.957-<br>0.997)  | 0.025*  |

|                                                                |                             |                 |                  |               |                      |            |
|----------------------------------------------------------------|-----------------------------|-----------------|------------------|---------------|----------------------|------------|
|                                                                | Missing <i>n</i> (%)        | 20 (0.33)       | 20 (0.33)        | -             |                      |            |
| Temperature<br>(°C) <i>n</i> (%)                               | Normal (36.5-37.5)          | 4517<br>(74.61) | 4,380<br>(96.97) | 137<br>(3.03) | Reference            | -          |
|                                                                | Hypothermia<br>( $<36.5$ )  | 1283<br>(21.19) | 1,177<br>(91.74) | 106<br>(8.26) | 2.88 (2.21-<br>3.74) | $<0.001^*$ |
|                                                                | Hyperthermia<br>( $>37.5$ ) | 254 (4.2)       | 251<br>(98.82)   | 3 (1.18)      | 0.38 (0.09-<br>1.02) | 0.1        |
| Mode delivery<br><i>n</i> (%)                                  | C-section                   | 1552<br>(25.6)  | 1500<br>(96.65)  | 52<br>(3.35)  | Reference            | -          |
|                                                                | Other                       | 4502<br>(74.4)  | 4308<br>(95.69)  | 194<br>(4.31) | 1.3 (0.96-<br>1.79)  | 0.1        |
| Respiratory<br>distress as<br>admission<br>reason <i>n</i> (%) | None                        | 2621<br>(43.3)  | 2583<br>(98.55)  | 38<br>(1.45)  | Reference            | -          |
|                                                                | Respiratory<br>distress     | 1794<br>(29.6)  | 1662<br>(92.64)  | 132<br>(7.36) | 5.4 (3.78-<br>7.89)  | $<0.001^*$ |
|                                                                | Other                       | 1639<br>(27.1)  | 1563<br>(95.36)  | 76<br>(4.64)  | 3.3 (2.24-<br>4.95)  | $<0.001^*$ |
| Head shape <i>n</i><br>(%)                                     | Normal                      | 5316<br>(87.8)  | 5162<br>(97.1)   | 154<br>(2.9)  | Reference            | -          |
|                                                                | Abnormal                    | 738<br>(12.2)   | 646<br>(87.53)   | 92<br>(12.47) | 4.77 (3.63-<br>6.25) | $<0.001^*$ |
| Meconium-<br>stained liquor                                    | No                          | 2647<br>(43.72) | 2537<br>(95.84)  | 110<br>(4.16) | Reference            | -          |



|                                                |                                  |                |                 |               |                            |       |
|------------------------------------------------|----------------------------------|----------------|-----------------|---------------|----------------------------|-------|
| passed <i>n</i> (%)                            | Yes                              | 2815<br>(46.5) | 2694<br>(95.7)  | 121<br>(4.3)  | 1.036 (0.8-<br>1.35)       | 0.793 |
|                                                | Missing                          | 592<br>(9.78)  | 577<br>(97.47)  | 15<br>(2.53)  | 0.6 (0.33-<br>1.003)       | 0.067 |
| Maternal HIV<br>infection <i>n</i> (%)         | Reactive                         | 529<br>(8.74)  | 509<br>(96.22)  | 20<br>(3.78)  | 0.72 (0.40-<br>1.27)       | 0.157 |
|                                                | Non-reactive                     | 4904<br>(81.0) | 4710<br>(96.04) | 194<br>(3.96) | 0.76 (0.52-<br>1.13)       | 0.266 |
|                                                | Missing                          | 621 (10.3)     | 589<br>(94.85)  | 32<br>(5.15)  | Reference                  | -     |
| Antenatal care<br>visits <i>n</i> (%)          | None                             | 643<br>(10.6)  | 612<br>(95.18)  | 31<br>(4.82)  | Reference                  | -     |
|                                                | 1 to 3                           | 3616<br>(59.7) | 3475<br>(96.1)  | 141<br>(3.9)  | 0.801<br>(0.546-<br>1.213) | 0.275 |
|                                                | >=4                              | 1795<br>(29.6) | 1721<br>(95.88) | 74<br>(4.12)  | 0.849<br>(0.558-<br>1.321) | 0.455 |
| Parity <i>n</i> (%)                            | Primiparous                      | 958<br>(15.8)  | 914<br>(95.41)  | 44<br>(4.59)  | Reference                  | -     |
|                                                | Multiparous                      | 5096<br>(84.2) | 4894<br>(96.04) | 202<br>(3.96) | 0.857<br>(0.62-<br>1.21)   | 0.366 |
| Pregnancy<br>condition<br>present <i>n</i> (%) | Hypertension or<br>pre-eclampsia | 805<br>(13.3)  | 771<br>(95.78)  | 34<br>(4.22)  | 1.169<br>(0.79-<br>1.68)   | 0.417 |

|                                                  |                                  |                |                 |               |                             |         |
|--------------------------------------------------|----------------------------------|----------------|-----------------|---------------|-----------------------------|---------|
|                                                  | Other                            | 656<br>(10.8)  | 611<br>(93.14)  | 45<br>(6.86)  | 1.95 (1.38-<br>2.72)        | <0.001* |
|                                                  | None                             | 4593<br>(75.9) | 4426<br>(96.36) | 167<br>(3.64) | Reference                   | -       |
| Risk factor of<br>sepsis <i>n</i> (%)            | Premature rupture<br>of membrane | 445<br>(7.35)  | 426<br>(95.73)  | 19<br>(4.27)  | 1.2 (0.72-<br>1.9)          | 0.455   |
|                                                  | Offensive liquor                 | 285<br>(4.71)  | 261<br>(91.58)  | 24<br>(8.42)  | 2.48 (1.55-<br>3.79)        | <0.001* |
|                                                  | Other                            | 347<br>(5.73)  | 322<br>(92.8)   | 25 (7.2)      | 2.09 (1.33-<br>3.17)        | 0.001*  |
|                                                  | None                             | 4977<br>(82.2) | 4799<br>(96.42) | 178<br>(3.58) | Reference                   | -       |
| Duration of<br>labour (in<br>hours) <i>n</i> (%) | <14                              | 4010<br>(66.2) | 3847<br>(95.94) | 163<br>(4.06) | Reference                   | -       |
|                                                  | 14-19                            | 710 (11.7)     | 671<br>(94.51)  | 39<br>(5.49)  | 1.37 (0.95-<br>1.94)        | 0.084   |
|                                                  | 20+                              | 360<br>(5.95)  | 340<br>(94.44)  | 20<br>(5.56)  | 1.39 (0.84-<br>2.18)        | 0.18    |
|                                                  | Missing                          | 974 (16.1)     | 950<br>(97.54)  | 24<br>(2.46)  | 0.596<br>(0.38-0.9)         | 0.02*   |
| Resuscitation<br>given <i>n</i> (%)              | No                               | 2925<br>(48.3) | 2919<br>(99.79) | 6 (0.21)      | Reference                   | -       |
|                                                  | Yes                              | 2938<br>(48.5) | 2702<br>(91.97) | 236<br>(8.03) | 42.49<br>(20.66-<br>107.88) | <0.001* |

|                                                                         |                                |                |                 |                |                           |         |
|-------------------------------------------------------------------------|--------------------------------|----------------|-----------------|----------------|---------------------------|---------|
|                                                                         | Unknown                        | 191<br>(3.15)  | 187<br>(97.91)  | 4 (2.09)       | 10.41<br>(2.64-<br>36.74) | <0.001* |
| Meconium-<br>stained<br>umbilicus <i>n</i><br>(%)                       | Meconium                       | 222<br>(3.67)  | 199<br>(89.64)  | 23<br>(10.36)  | 3.02 (1.87-<br>4.67)      | <0.001* |
|                                                                         | Other                          | 5158<br>(85.2) | 4968<br>(96.32) | 190<br>(3.68)  | Reference                 | -       |
|                                                                         | Missing                        | 674 (11.1)     | 641<br>(95.1)   | 33 (4.9)       | 1.35 (0.91-<br>1.94)      | 0.124   |
| Crying after<br>birth <i>n</i> (%)                                      | Yes                            | 4017<br>(66.4) | 4003<br>(99.65) | 14<br>(0.35)   | 0.072<br>(0.03-<br>0.19)  | <0.001* |
|                                                                         | No                             | 1885<br>(31.1) | 1660<br>(88.06) | 225<br>(11.94) | 2.81 (1.4-<br>6.69)       | 0.009*  |
|                                                                         | Unknown                        | 152<br>(2.51)  | 145<br>(95.39)  | 7 (4.61)       | Reference                 | -       |
| Reason for<br>caesarean<br>section <i>n</i> (%)                         | Foetal distress                | 271<br>(4.48)  | 257<br>(94.8)   | 14 (5.2)       | 1.21 (0.66-<br>2.03)      | 0.508   |
|                                                                         | Other reason for C-<br>section | 1291<br>(21.3) | 1253<br>(97.1)  | 38 (2.9)       | 0.67 (0.47-<br>0.95)      | 0.027*  |
|                                                                         | Other delivery                 | 4492<br>(74.2) | 4298<br>(95.7)  | 194<br>(4.3)   | Reference                 | -       |
| Neonatal<br>encephalopathy<br>as an<br>admission<br>reason <i>n</i> (%) | Neonatal<br>encephalopathy     | 110 (1.82)     | 81 (73.6)       | 29<br>(26.4)   | 9.45 (5.97-<br>14.59)     | <0.001* |
|                                                                         | Other reasons                  | 5944<br>(98.2) | 5727<br>(96.3)  | 217<br>(3.7)   | Reference                 | -       |

|                                     |                                            |                |                |               |                            |         |
|-------------------------------------|--------------------------------------------|----------------|----------------|---------------|----------------------------|---------|
| Problems during labour <i>n</i> (%) | Significant vaginal bleeding/<br>eclampsia | 388<br>(6.41)  | 374<br>(96.4)  | 14 (3.6)      | 0.88 (0.49-<br>1.47)       | 0.653   |
|                                     | Other problems                             | 340<br>(5.62)  | 325<br>(95.6)  | 14 (4.4)      | 1.09 (0.61-<br>1.79)       | 0.761   |
|                                     | None                                       | 5326<br>(88.0) | 5109<br>(95.9) | 217<br>(4.1)  | Reference                  | -       |
| Place of birth <i>n</i> (%)         | SMCH                                       | 4321<br>(71.4) | 4144<br>(95.9) | 177<br>(4.1)  | Reference                  | -       |
|                                     | Other hospital in Harare                   | 638 (10.5)     | 613<br>(96.1)  | 25 (3.9)      | 0.96 (0.61-<br>1.44)       | 0.832   |
|                                     | Other place                                | 389<br>(6.43)  | 386<br>(99.2)  | 3 (0.8)       | 0.18 (0.05-<br>0.48)       | 0.004*  |
|                                     | Missing                                    | 706 (11.7)     | 665<br>(94.2)  | 41 (5.8)      | 1.44 (1.01-<br>2.03)       | 0.04*   |
| Neonatal outcome <i>n</i> (%)       | Neonatal death                             | 616 (10.2)     | 471<br>(76.5)  | 145<br>(23.5) | 22.46<br>(16.61-<br>30.66) | <0.001* |
|                                     | Discharged/other                           | 4880<br>(80.6) | 4814<br>(98.6) | 66 (1.4)      | Reference                  | -       |
|                                     | Missing                                    | 558<br>(9.22)  | 523<br>(93.7)  | 35 (6.3)      | 4.88 (3.18-<br>7.38)       | <0.001* |

261

262 For the ‘Total neonates’ column in table 2, counts and percentages are shown out of 6,054. For the  
263 ‘TS $\leq$ 10’ and ‘TS>10’ columns, within the group distribution of counts and percentages are shown. For  
264 example, in the Gender variable, 2557 out of 6054 (42.2%) of total newborns were female. Amongst  
265 these 2557 newborns with a Thompson score, 2463 (96.32%) had TS $\leq$ 10 and 94 (3.68%) had TS>10.

266 Compared to those with  $TS \leq 10$ , neonates with  $TS > 10$  had significantly lower median Apgar score at  
267 5-minute. Those with  $TS > 10$  had 22 times higher odds of neonatal death compared to those with  $TS \leq 10$ .

268

## 269 **Logistic regression analysis and predictive modelling**

270 Univariable logistic regression models were fitted to test the research hypothesis regarding the  
271 relationship between the selected candidate predictors and Thompson score greater than 10. 15 out of  
272 24 of the candidate predictors were significantly associated (Table 2).

273 Although ‘Other conditions’ for pregnancy conditions variable showed significant association ( $p$ -value  
274  $< 0.001$ ), it was excluded from multiple logistic regression modelling as it alone includes multiple and  
275 ‘unknown’ pregnancy conditions. Thus, it may not be effective in identifying which of those pregnancy  
276 conditions is most predictive of an abnormal Thompson score. Similarly, ‘Other place’ in the place of  
277 birth variable was significantly associated ( $p=0.004$ ) but has a very small number of cases ( $n=3$ ) and  
278 missing place of birth was also significant ( $p=0.04$ ). Due to uncertainty in defining the location for  
279 Thompson score greater than 10 this variable was excluded from the final model. For duration of labour  
280 variable, only the ‘missing’ category was significant ( $p=0.02$ ) and was excluded for the same reason.

281 The remaining 12 candidate predictors that were used in multiple logistic regression analysis were: 1.  
282 neonatal heart rate (beats/min); 2. Apgar score at 5 minutes; 3. temperature at admission; 4. NE as a  
283 reason for admission; 5. respiratory distress as admission reason; 6. head shape; 7. reason for caesarean  
284 section (C-section); 8. maternal age (years); 9. crying immediately after birth; 10. duration of  
285 resuscitation (minutes); 11. meconium-stained umbilicus and 12. risk factors of sepsis.

286 Multivariable logistic regression models were fitted for the final dataset of 6054 neonates to test the  
287 null hypothesis that there was no relationship between these 12 predictor variables selected from the  
288 univariable analysis and a Thompson score  $> 10$ . Stepwise regression was used for analysis with LRT  
289 was used to select the final model. Table 3 shows the regression coefficients and odds ratios for this  
290 model.

291 Table 3: Regression coefficients and odds ratios for the final model ( $n=6054$ )

| Predictor                                         | Estimate | Standard error | Odds ratio | 95% CI        | p-value |
|---------------------------------------------------|----------|----------------|------------|---------------|---------|
| Intercept                                         | 2.391    | 0.837          | -          | -             | -       |
| Heart rate                                        | -0.023   | 0.004          | 0.977      | 0.97 - 0.985  | <0.001  |
| Apgar score                                       | -0.768   | 0.053          | 0.464      | 0.418 - 0.514 | <0.001  |
| Temperature < 36.5                                | 0.496    | 0.168          | 1.642      | 1.178 - 2.278 | 0.003   |
| Abnormal head shape                               | 0.751    | 0.172          | 2.119      | 1.508 - 2.965 | <0.001  |
| Neonatal encephalopathy as a reason for admission | 0.905    | 0.29           | 2.473      | 1.385 - 4.32  | 0.002   |
| Resuscitation received                            | 1.375    | 0.471          | 3.954      | 1.69 - 11.008 | 0.004   |
| Respiratory distress as an admission reason       | 0.909    | 0.232          | 2.483      | 1.593 - 3.963 | <0.001  |
| Other admission reasons                           | 0.594    | 0.248          | 1.811      | 1.122 - 2.973 | 0.017   |
| Other risk factors of sepsis                      | 0.711    | 0.307          | 2.035      | 1.096 - 3.665 | 0.02    |

292

293 Abnormal neonatal heart rate on admission (<100 bpm) and lower Apgar score at 5-minutes were  
 294 associated with higher odds of Thompson score >10. The rest of the predictors were associated with  
 295 increased odds of a Thompson score greater than 10 with the highest being receiving resuscitation.  
 296 Hypothermia at admission (Temperature < 36.5) was found to be associated with increased odds of NE.

297

## 298 Discussion

299 To our knowledge, this is the first large-sample prospective study in a low-resource setting exploring  
 300 associations between abnormal Thompson score and thus risk of NE on admission of term infants

301 (gestation age > 36). NE is a clinical diagnosis in low-resource settings where investigations such as  
302 EEG, cranial imaging and umbilical cord gases are typically unavailable. Thompson score is a key  
303 scoring system used to identify at-risk neonates. However, it may be unclear which neonates should be  
304 assessed for clinical signs of NE and thus necessitate the measurement of Thompson score. This study  
305 aimed to identify key risk factors of neonates with abnormal Thompson score (>10) based on data  
306 collected using Neotree from 6,054 neonates admitted at a tertiary-level hospital in Zimbabwe. The  
307 prevalence of abnormal Thompson score (as a proxy of diagnosis of NE) in this population of term  
308 neonates was 40 per 1000 with 58.9% (145 out of 246) of these neonates dying. It is not possible to  
309 compare this with prevalence estimates per 1000 live births. These estimates are lower than a recent  
310 study in Nigeria (Ezenwa et al., 2021) reporting prevalence of 71 per 1000 admissions with 25.3%  
311 respectively where NE was defined in a term infant as the presence of encephalopathy or altered  
312 consciousness and multi-organ failure with a positive history of delayed cry at birth or required  
313 prolonged resuscitation at birth in addition to the presence of any of the neurological features as  
314 contained in the Sarnat and Sarnat classification.

315 Initially, 43 predictors were identified based on literature review and consultations with clinicians in  
316 Zimbabwe. Of these, 24 were selected to be most important. Nine risk factors were identified using  
317 logistic regression, the presence of which might prompt healthcare providers to undertake a  
318 neurological examination and calculate a Thompson score. These are the most predictive covariates for  
319 determining a Thompson score of greater than 10: Apgar score at 5-minute, neonatal heart rate on  
320 admission, hypothermia at admission, resuscitation, abnormal head shape, NE and respiratory distress  
321 as admission reasons along with others; and maternal risk factors of sepsis other than premature rupture  
322 of membrane and offensive liquor.

323 Lower Apgar score was associated with higher odds of abnormal Thomson score, which was in line  
324 with the studies from scoping review where all studies used low Apgar score as an inclusion criterion.  
325 In a similar study conducted by Futrakul et al. (2006) the authors found significant association of NE  
326 with Apgar score at 5-minute. NE as admission reason increased the odds of an abnormal Thompson  
327 score by twice. Although maternal pre-eclampsia was one of the prenatal diagnoses reported by Biselele

328 et al. (2013) and Biselele et al. (2014), it was not significantly associated in this study population.  
329 Receiving resuscitation at birth significantly increased the odds of abnormal Thompson score. This is  
330 plausible as previous studies used resuscitation until 10-minutes after birth as an inclusion characteristic  
331 for perinatal asphyxia besides low Apgar score (Biselele et al., 2014). Low neonatal heart rate on  
332 admission suggests that neonates who may be in extremis are being transferred to the neonatal unit  
333 reflecting severity of insult around the time of birth. Although some studies reported inappropriate or  
334 absence of antenatal care as a maternal risk factor (Futrakul et al., 2006; Bhagwani et al., 2016), this  
335 risk factor was not strongly associated in this study population. This study identified that maternal risk  
336 factor of sepsis, other than premature rupture of membrane and offensive liquor can increase the odds  
337 of Thompson score greater than 10.

338 A key strength of this study is that the *a priori* variables used in predictive modelling were assembled  
339 using a combination of evidence from the literature, routine health records and clinically driven  
340 reasoning. In this way, the study is grounded in the lived experiences of clinicians, data collection  
341 systems and healthcare providers in low-resource settings who often have limited data and resources  
342 needed save the lives of infants. Compared to previous studies that modelled risk factors of NE  
343 (Futrakul et al., 2006), this paper also relied on a larger sample, thus has greater statistical power.

344

### 345 **Limitation**

346 A key limitation in this study is the small number of missing values in most variables, including Apgar  
347 score. Some confidence intervals were wide, possibly due to the number of study participants, indicating  
348 lower statistical power. In addition, while some of the variables had significant effects, such as ‘Other  
349 reasons’ for admission, it may be complicated to apply within the Neotree system given this group can  
350 have a variety of admission reasons.

351

### 352 **Conclusion**



353 The clinical triggers for suspecting NE and thus performing the Thompson score are not yet clearly  
354 defined. With the objective to construct an empirically-driven and parsimonious model for identifying  
355 Thompson score >10 in low-resource settings, this study identified nine risk factors that are most  
356 predictive: eight neonatal factors – Apgar score at 5 minutes, foetal heart rate at admission, hypothermia  
357 at admission, resuscitation, abnormal head shape, NE and respiratory distress as admission reasons  
358 along with others; and one intrapartum factor– maternal risk factors of sepsis other than premature  
359 rupture of membrane and offensive liquor.

360 The results imply that integration of these factors into the Neotree application would enable healthcare  
361 professionals to identify neonates to screen for NE using the Thompson score. However, before  
362 operationalisation into the application, further work is needed to evaluate the model’s performance  
363 through sensitivity and specificity analysis. This evaluation should ensure a large enough sample of  
364 Thompson scores to allow for the dichotomisation of predictors such as Apgar score and heart rate.  
365 Finally, future work could also focus on using more novel predictive model building techniques that  
366 use artificial intelligence and machine learning.

### 367 **Acknowledgements**

368 The main research question and methods were conceived by EM in consultation with MH, FF and MCB.  
369 GC, SC, CC and LC provided feedback and suggestions for determining the *a priori* variables. NK and  
370 EC conducted the scoping review. NK prepared the data and performed data analysis with support from  
371 MCB and wrote the core manuscript. MH and MCB supported with overall feedback, editing and  
372 proofreading of the manuscript. The wider Neotree research team and staff at Sally Mugabe Central  
373 Hospital ensured data collection. This research was supported by the National Institute for Health  
374 Research (NIHR) Great Ormond Street Hospital Biomedical Research Centre. The views expressed are  
375 those of the authors and not necessarily those of the National Health Service (NHS), the NIHR or the  
376 UK Department of Health.

377

### 378 **Ethics**

379 This project is a sub-study of the wider Neotree project which has research ethical approval from the  
380 Harare Central Hospital Research Ethics Committee (Reference number HCHEC070618/58) and  
381 UCL Research Ethics Committee (UCL Research Ethics Committee (reference 5019/004) including  
382 the analysis carried out in this paper. This sub-study is registered with the UCL Great Ormond Street  
383 Institute of Child Health R&D Office (R&D number 20PP42).

384

### 385 **Competing interests**

386 No competing interests to report.

387

### 388 **Funding**

389 This study was funded by the Wellcome Trust (215742/Z/19/Z).

### 390 **References**

- 391 1. Aslam S, Strickland T, Molloy EJ. Neonatal encephalopathy: need for recognition of  
392 multiple etiologies for optimal management. *Front Pediatr.* 2019; 7: 142. 2019.
- 393 2. Badawi N, Kurinczuk JJ, Keogh JM, Alessandri LM, O’Sullivan F, Burton PR, et al.  
394 Antepartum risk factors for newborn encephalopathy: the Western Australian case-  
395 control study. *BMJ.* 1998 Dec 5;317(7172):1549–53.
- 396 3. Bhagwani DK, Sharma M, Dolker S, Kothapalli S. To study the correlation of  
397 thompson scoring in predicting early neonatal outcome in post asphyxiated term  
398 neonates. *Journal of Clinical and Diagnostic Research.* 2016;10(11):SC16–9.
- 399 4. Biselele T, Naulaers G, Muntu PB, Nkidiaka E, Kapepela M, Mavinga L, et al. A  
400 descriptive study of perinatal asphyxia at the university hospital of kinshasa  
401 (democratic republic of congo). *Journal of Tropical Pediatrics.* 2013 Aug;59(4):274–  
402 9.

- 403 5. Biselele T, Naulaers G, Tady B. Evolution of the Thompson score during the first 6 h  
404 in infants with perinatal asphyxia. *ACTA PAEDIATRICA*. 2014 Feb;103(2):145–8.
- 405 6. Boldingh AM, Solevåg AL, Nakstad B. Outcomes following neonatal  
406 cardiopulmonary resuscitation. *Tidsskrift for Den norske legeforening* [Internet].  
407 2018 May 28 [cited 2023 Nov 30]; Available from:  
408 [https://tidsskriftet.no/en/2018/05/oversiktsartikkel/outcomes-following-neonatal-](https://tidsskriftet.no/en/2018/05/oversiktsartikkel/outcomes-following-neonatal-cardiopulmonary-resuscitation)  
409 [cardiopulmonary-resuscitation](https://tidsskriftet.no/en/2018/05/oversiktsartikkel/outcomes-following-neonatal-cardiopulmonary-resuscitation)
- 410 7. Crehan C, Kesler E, Nambiar B, Dube Q, Lufesi N, Giaccone M, et al. The NeoTree  
411 application: developing an integrated mHealth solution to improve quality of newborn  
412 care and survival in a district hospital in Malawi. *BMJ Glob Health*. 2019  
413 Jan;4(1):e000860.
- 414 8. Doreswamy SM, Ramakrishnegowda A. Prediction of encephalopathy in perinatal  
415 asphyxia score: Reaching the unreached. *Journal of Perinatal Medicine*. 2021  
416 Jul;49(6):748–54.
- 417 9. Evans M, Crehan C, Corden M, Heys M. G449(P) Using the modified delphi method  
418 to establish consensus on clinical algorithms for a neonatal mobile health application  
419 for low-income countries. *Archives of Disease in Childhood*. 2020 Oct 1;105(Suppl  
420 1):A162–A162.
- 421 10. Ezenwa BN, Olorunfemi G, Fajolu I, Adeniyi T, Oleolo-Ayodeji K, Kene-Udemezue  
422 B, et al. Trends and predictors of in-hospital mortality among neonates with hypoxic  
423 ischaemic encephalopathy at a tertiary hospital in Nigeria: A retrospective cohort  
424 study. *PLOS ONE*. 2021 Apr 26;16(4):e0250633.
- 425 11. Futrakul S, Praisuwanna P, Thaitumyanon P. Risk factors for hypoxic-ischemic  
426 encephalopathy in asphyxiated newborn infants. *Journal of the Medical Association*  
427 *of Thailand*. 2006 Mar;89(3):322–8.

- 428 12. Gannon H, Chimhini G, Cortina-Borja M, Chiyaka T, Mangiza M, Fitzgerald F, et al.  
429 Risk factors of mortality in neonates with neonatal encephalopathy in a tertiary  
430 newborn care unit in Zimbabwe over a 12-month period. *PLOS Global Public Health*.  
431 2022 Dec 20;2(12):e0000911.
- 432 13. Gannon H, Chimhuya S, Chimhini G, Neal SR, Shaw LP, Crehan C, et al. Electronic  
433 application to improve management of infections in low-income neonatal units: pilot  
434 implementation of the NeoTree beta app in a public sector hospital in Zimbabwe.  
435 *BMJ Open Qual*. 2021 Jan;10(1):e001043.
- 436 14. Herring N, Kalla M, Paterson DJ. The autonomic nervous system and cardiac  
437 arrhythmias: current concepts and emerging therapies. *Nat Rev Cardiol*. 2019  
438 Dec;16(12):707–26.
- 439 15. Horn AR, Swingler GH, Myer L, Linley LL, Raban MS, Joolay Y, et al. Early clinical  
440 signs in neonates with hypoxic ischemic encephalopathy predict an abnormal  
441 amplitude-integrated electroencephalogram at age 6 hours. *BMC Pediatrics*. 2013 Apr  
442 10;13(1):52.
- 443 16. Horn AR, Swingler GH, Myer L, Linley LL, Chandrasekaran M, Robertson NJ. Early  
444 clinical predictors of a severely abnormal amplitude-integrated electroencephalogram  
445 at 48 hours in cooled neonates. *Acta Paediatrica, International Journal of Paediatrics*.  
446 2013 Aug;102(8).
- 447 17. Khan N, Crehan C, Hull-Bailey T, Normand C, Larsson L, Nkhoma D, et al. Software  
448 development process of Neotree-a data capture and decision support system to  
449 improve newborn healthcare in low-resource settings. *Wellcome Open Research*.  
450 2022;7(305):305.

- 451 18. Kurinczuk JJ, White-Koning M, Badawi N. Epidemiology of neonatal  
452 encephalopathy and hypoxic–ischaemic encephalopathy. *Early Human Development*.  
453 2010 Jun 1;86(6):329–38.
- 454 19. Liang L, Kotadia N, English L, Kissoon N, Ansermino JM, Kabakyenga J, et al.  
455 Predictors of Mortality in Neonates and Infants Hospitalized With Sepsis or Serious  
456 Infections in Developing Countries: A Systematic Review. *Frontiers in Pediatrics*  
457 [Internet]. 2018 [cited 2023 Nov 30];6. Available from:  
458 <https://www.frontiersin.org/articles/10.3389/fped.2018.00277>
- 459 20. Mendler MR, Mendler I, Hassan MA, Mayer B, Bode H, Hummler HD. Predictive  
460 Value of Thompson-Score for Long-Term Neurological and Cognitive Outcome in  
461 Term Newborns with Perinatal Asphyxia and Hypoxic-Ischemic Encephalopathy  
462 Undergoing Controlled Hypothermia Treatment. *Neonatology*. 2018 Aug  
463 21;114(4):341–7.
- 464 21. Mrelashvili A, Russ JB, Ferriero DM, Wusthoff CJ. The Sarnat score for neonatal  
465 encephalopathy: looking back and moving forward. *Pediatr Res*. 2020 Dec;88(6):824–  
466 5.
- 467 22. Mwakyusa SD, Manji KP, Massawe AW. The hypoxic ischaemic encephalopathy  
468 score in predicting neurodevelopmental outcomes among infants with birth asphyxia  
469 at the Muhimbili National Hospital, Dar-es-Salaam, Tanzania. *Journal of Tropical*  
470 *Pediatrics*. 2009;55(1):8–14.
- 471 23. O'Donnell CPF, Kamlin COF, Davis PG, Carlin JB, Morley CJ. Interobserver  
472 variability of the 5-minute Apgar score. *The Journal of Pediatrics*. 2006 Oct  
473 1;149(4):486–9.

- 474 24. Ou Z, Yu D, Liang Y, He H, He W, Li Y, et al. Global trends in incidence and death  
475 of neonatal disorders and its specific causes in 204 countries/territories during 1990–  
476 2019. *BMC Public Health*. 2022 Feb 19;22(1):360.
- 477 25. R Core Team. R: A Language and Environment for Statistical Computing. 2021. R  
478 Foundation for Statistical Computing, Vienna, Austria.
- 479 26. Sadhanidar P, Deka N, Agarwal S. Evaluation of Role of Magnetic Resonance  
480 Imagine in Newborns with Suspected Hypoxic Ischaemic Injury and its Association  
481 with Clinical Staging: A Cross-sectional Study. *JOURNAL OF CLINICAL AND*  
482 *DIAGNOSTIC RESEARCH*. 2022 Jan;16(1):TC19–23.
- 483 27. Sarnat HB, Sarnat MS. Neonatal encephalopathy following fetal distress: a clinical  
484 and electroencephalographic study. *Archives of neurology*. 1976;33(10):696–705.
- 485 28. Singh R, Das BK, Shah GS. Outcome of newborns with birth asphyxia. *Journal of the*  
486 *Nepal Medical Association*. 2005;44(158):44–6.
- 487 29. Stofberg JPJ, Spittal GW, Hinkel T, Ras T. A descriptive study of suspected perinatal  
488 asphyxia at mitchells plain district hospital: A case series. *South African Family*  
489 *Practice*. 2020;62(1):1–10.
- 490 30. Tann CJ, Webb EL, Lassman R, Ssekyewa J, Sewegaba M, Musoke M, et al. Early  
491 Childhood Outcomes After Neonatal Encephalopathy in Uganda: A Cohort Study.  
492 *eClinicalMedicine*. 2018 Dec 1;6:26–35.
- 493 31. Thompson C, Puterman A, Linley L, Hann F, van der Elst C, Molteno C, et al. The  
494 value of a scoring system for hypoxic ischaemic encephalopathy in predicting  
495 neurodevelopmental outcome. *Acta Paediatrica*. 1997;86(7):757–61.
- 496 32. Thorsen P, Jansen-van der Weide MC, Groenendaal F, Onland W, van Straaten HLM,  
497 Zonnenberg I, et al. The Thompson Encephalopathy Score and Short-Term Outcomes

- 498 in Asphyxiated Newborns Treated With Therapeutic Hypothermia. *Pediatric*  
499 *Neurology*. 2016 Jul 1;60:49–53.
- 500 33. Vannucci RC. HYPOXIC-ISCHEMIC ENCEPHALOPATHY. *Am J Perinatol*.  
501 2000;17(3):113–20.
- 502 34. Volpe JJ. Neonatal encephalopathy: An inadequate term for hypoxic–ischemic  
503 encephalopathy. *Annals of Neurology*. 2012;72(2):156–66.
- 504 35. Weeke LC, Vilan A, Toet MC, van Haastert IC, de Vries LS, Groenendaal F. A  
505 Comparison of the Thompson Encephalopathy Score and Amplitude-Integrated  
506 Electroencephalography in Infants with Perinatal Asphyxia and Therapeutic  
507 Hypothermia. *Neonatology*. 2017 Feb 17;112(1):24–9.
- 508 36. WHO. Standards for improving the quality of care for small and sick newborns in  
509 health facilities [Internet]. [cited 2023 Nov 30]. Available from:  
510 <https://www.who.int/publications-detail-redirect/9789240010765>.

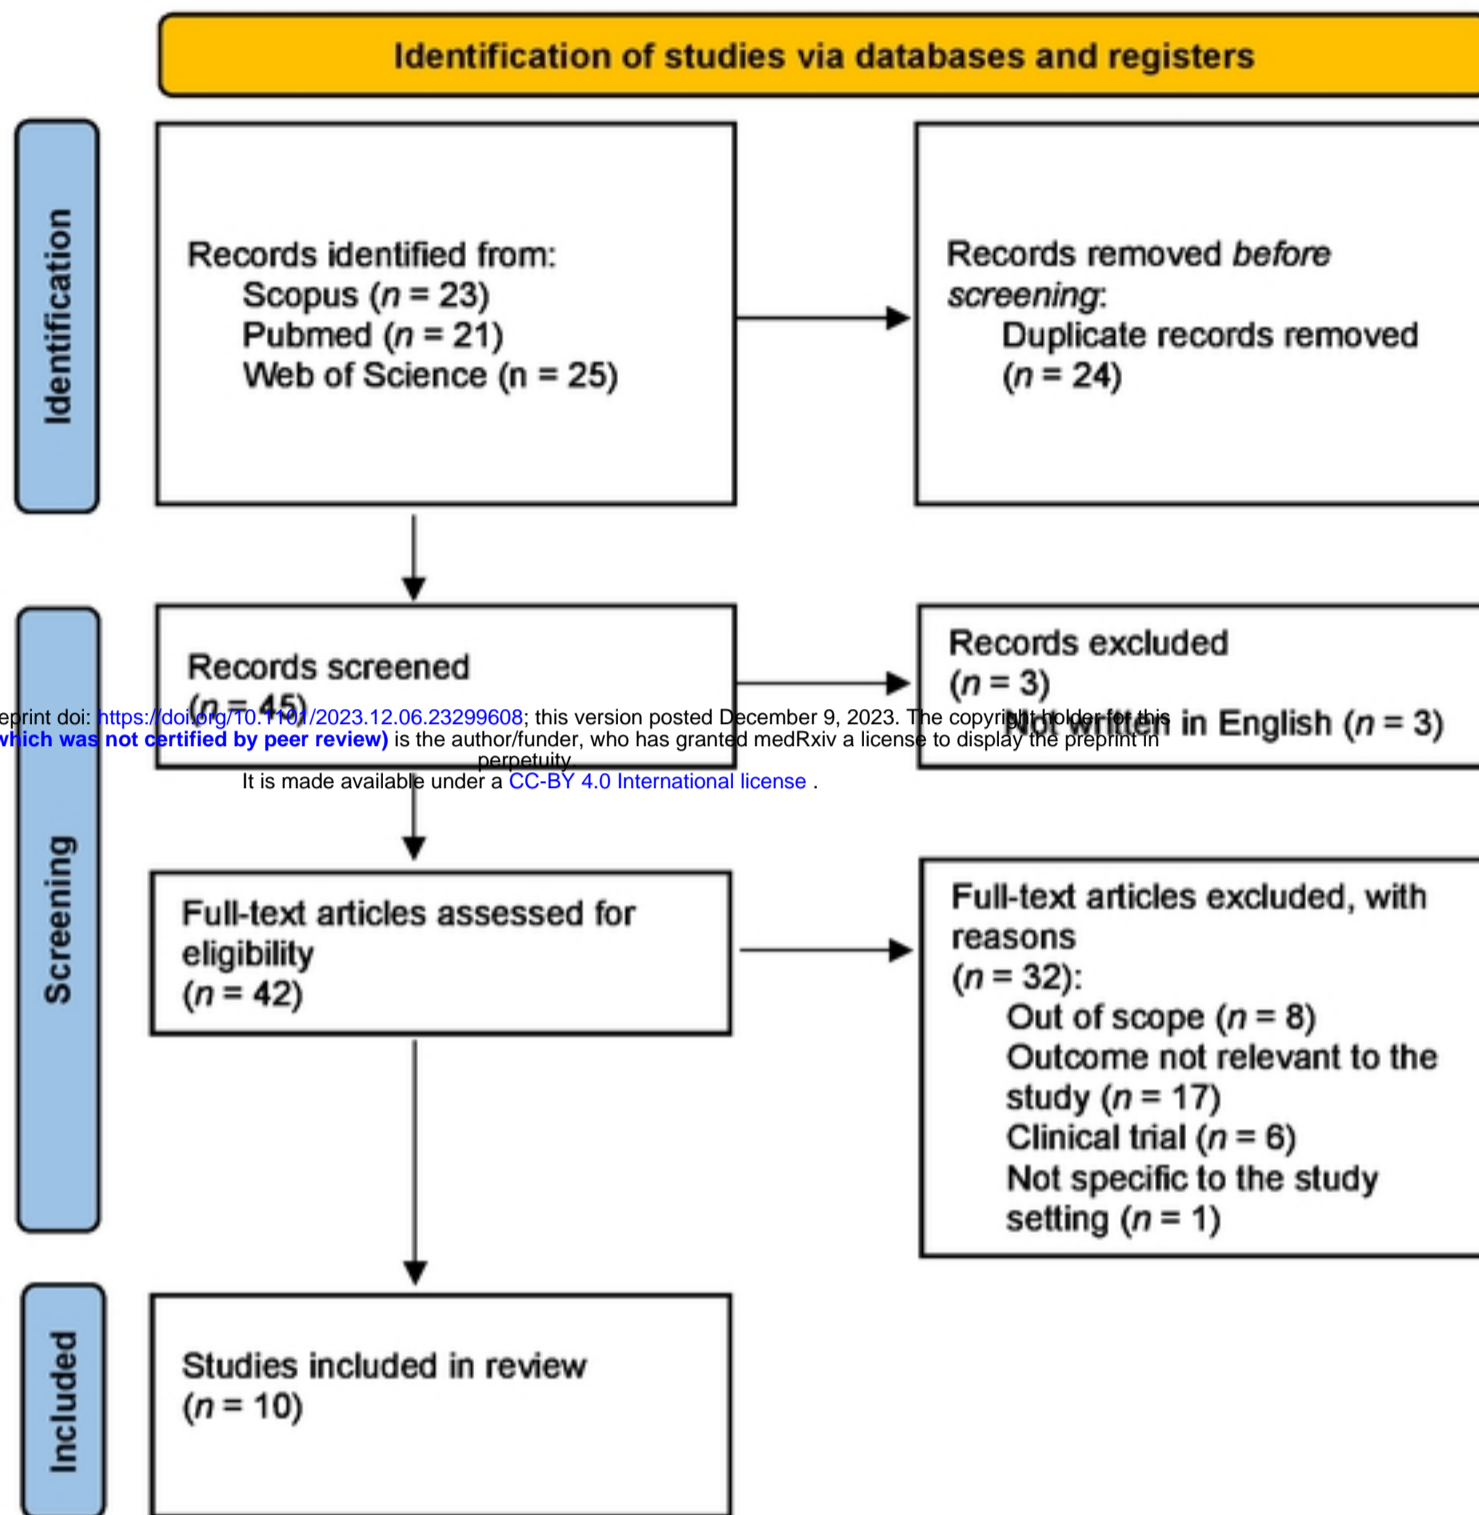

Figure 1
